# Supplementary material for: Water soluble extended naphthalene diimides as pH fluorescent sensors and G-quadruplex ligands
Source: Royal Society of Chemistry journal article supplement (doi:10.1039/c2ob07006e), 2012-01-01

## Supplementary Informations

# Water Soluble Extended Naphthalene Diimides as pH Fluorescent Sensors and G-Quadruplex Ligands

*Filippo Doria,<sup>‡</sup> Matteo Nadai,<sup>§</sup> Giovanna Sattin,<sup>§</sup> Luca Pasotti,<sup>‡</sup> Sara N. Richter,<sup>§\*</sup>*

*Mauro Freccero.<sup>‡\*</sup>*

<sup>‡</sup>Dipartimento di Chimica, Università di Pavia, V.le Taramelli 10, 27100 Pavia, Italy.

<sup>§</sup>Dipartimento di Medicina Molecolare, Università di Padova, via Gabelli 63, 35121  
Padua, Italy.

## Inventory

### Supplemental Experimental Procedures:

|                                                                                                                                                              |         |
|--------------------------------------------------------------------------------------------------------------------------------------------------------------|---------|
| General method                                                                                                                                               | Page S2 |
| HPLC PURITY DATA                                                                                                                                             | S3-S7   |
| <sup>1</sup> H- and <sup>13</sup> C-NMR spectra of the ligands <b>3a</b> , <b>3b</b> , <b>4a</b> , <b>4b</b> , <b>6b</b> , <b>7a</b> , <b>7b</b> , <b>8a</b> | S8-S14  |

## Supplemental Experimental Procedures

### General Procedures.

Reagents, solvents and chemicals were purchased from Alfa Aesar, or Sigma-Aldrich and were used as supplied without further purification. TLC analysis was carried out on silica gel (Merck 60F-254) with visualization at 254 and 366 nm. HPLC analysis and purifications were performed using two different HPLC: Waters system combining a Delta 600 PUMP, a 2489 UV/VIS detector and Fraction Collector III (for preparative and analytical) and an Agilent system SERIES 1260 (for analytical). The analytical column was XSelect CSH Phenyl-Hexyl (150 x 4.6 mm) (Waters). The preparative column was XSelect CSH Prep Phenyl-Hexyl 5 $\mu$ m (150 x 30 mm) (Waters). Flows were 1 ml/min for analytical and 27 ml/min for preparative. Two analytical methods were used: method A (Aqueous solvent: 0.1% trifluoroacetic acid in water; Organic solvent: Acetonitrile; Gradient: 95% aqueous for 2 minutes after injection, gradually to 60% aqueous over 14 minutes and at the end an isocratic flow over 4 minutes), method B (Aqueous solvent: 0.1% trifluoroacetic acid in water; Organic solvent: Acetonitrile; Gradient: 95% aqueous for 4 minutes after injection, gradually to 40% aqueous over 16 minutes and at the end an isocratic flow over 2 minutes). Preparative HPLC were performed using an upgrade of the method A and B.  $^1\text{H}$ ,  $^{13}\text{C}$ -NMR spectra were recorded on a 300 MHz spectrometer and the chemical shifts are reported relative to TMS. The structures of new compounds were deduced from the results of  $^1\text{H}$ , and  $^{13}\text{C}$ NMR. Elemental analyses were made on a Carlo Erba CNH analyzer, model 19106.

## 1. HPLC PURITY DATA

### 3a Method A

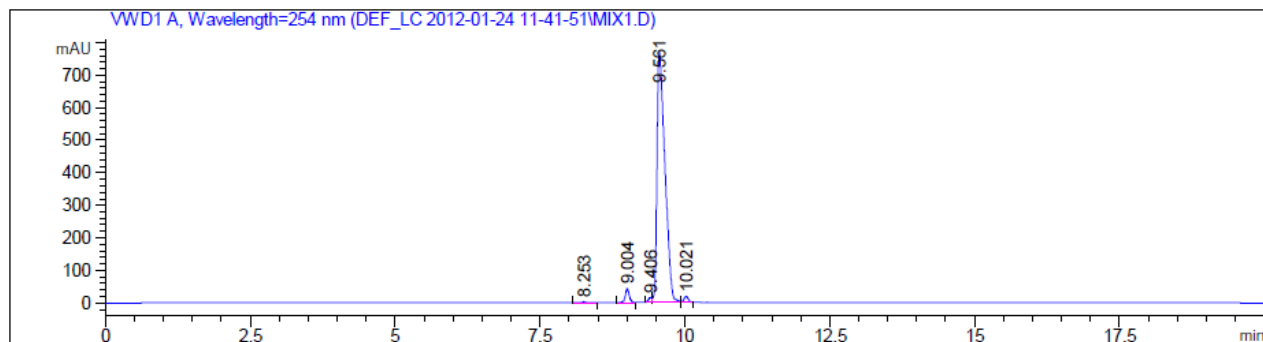

### 3b Method A

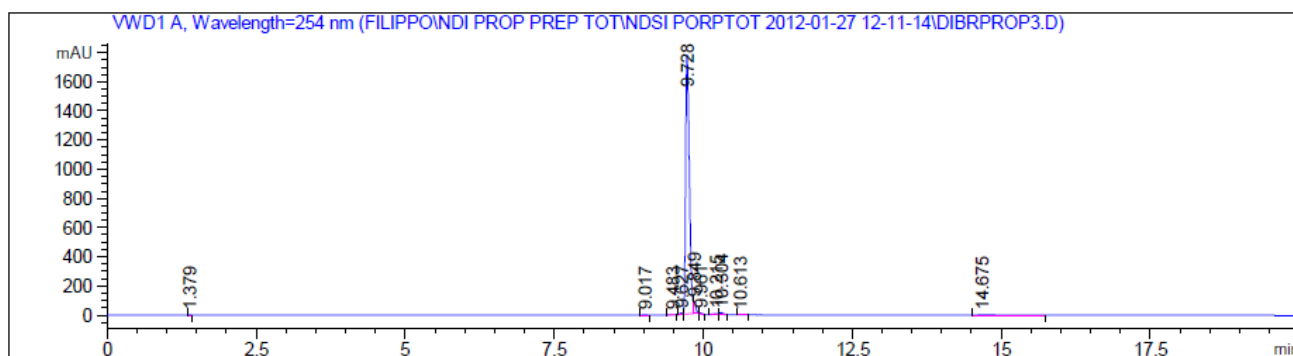

4a Method A

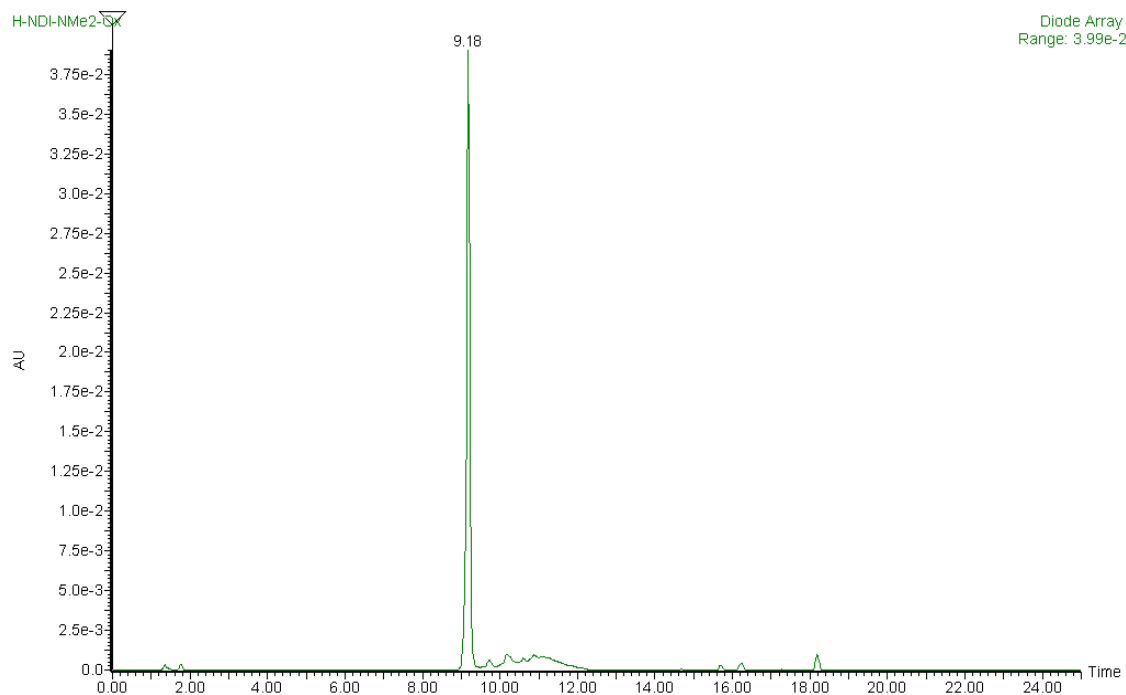

4b Method A

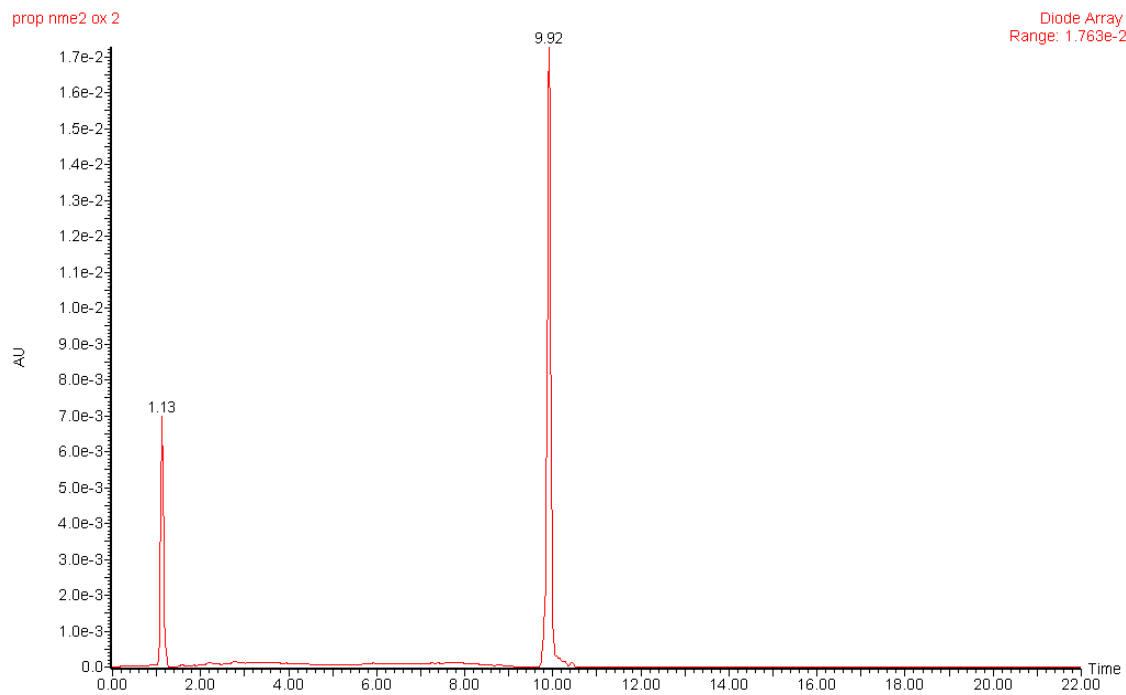

4c Method B

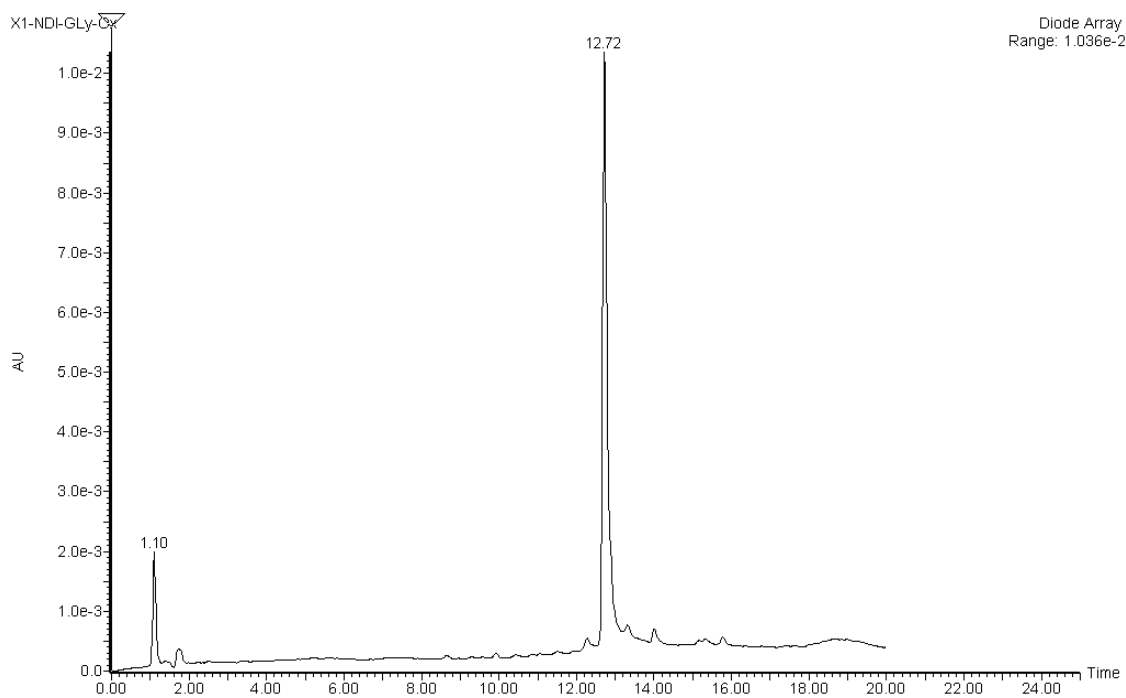

6b Method A

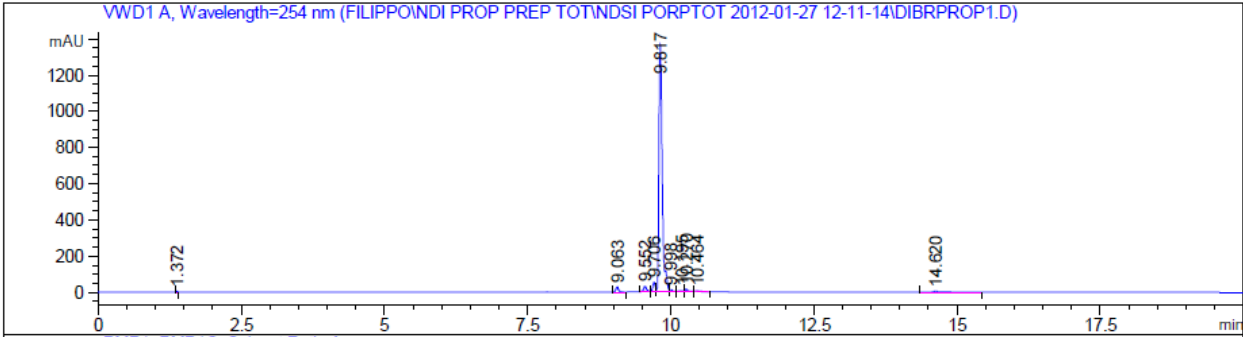

7a Method A

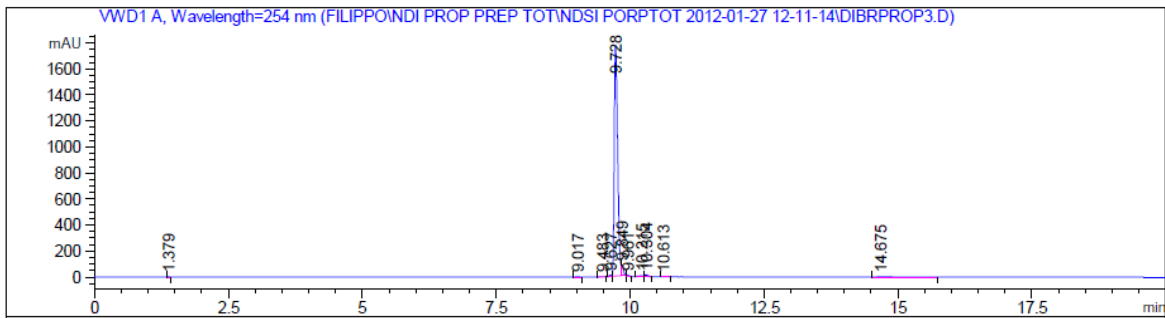

7b Method A

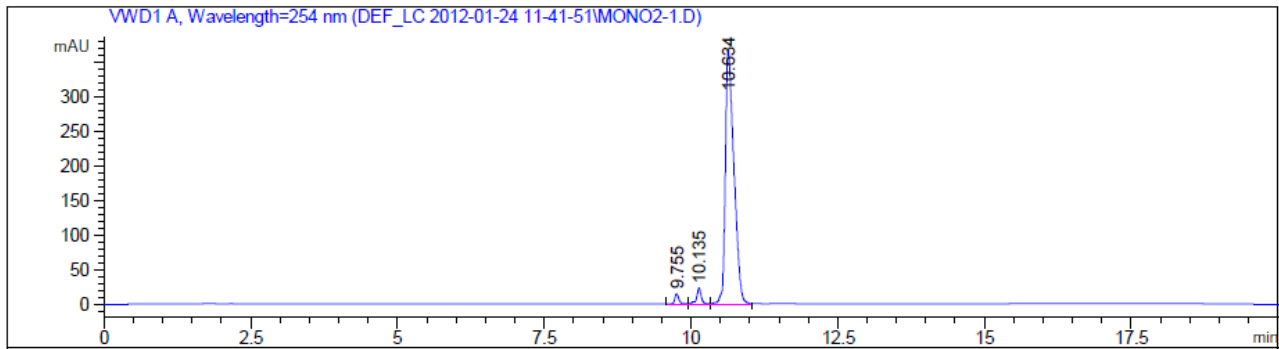

8a Method A

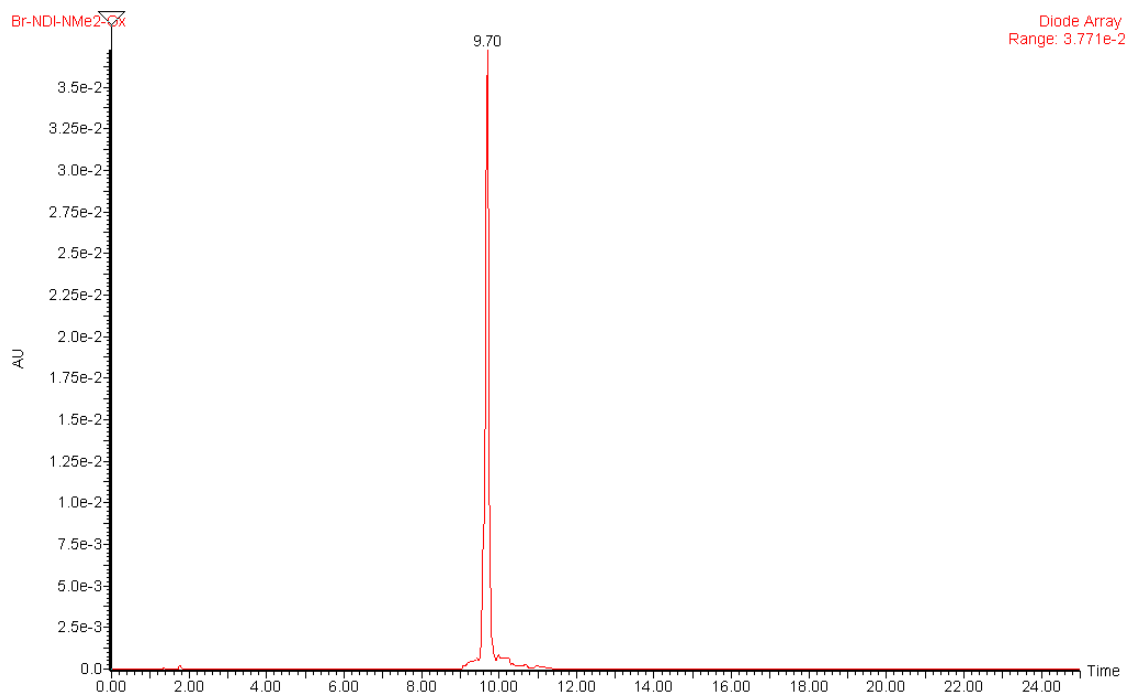

## 2. NMR spectra

300 MHz  $^1\text{H}$  NMR spectra of 3a  $\text{CDCl}_3$

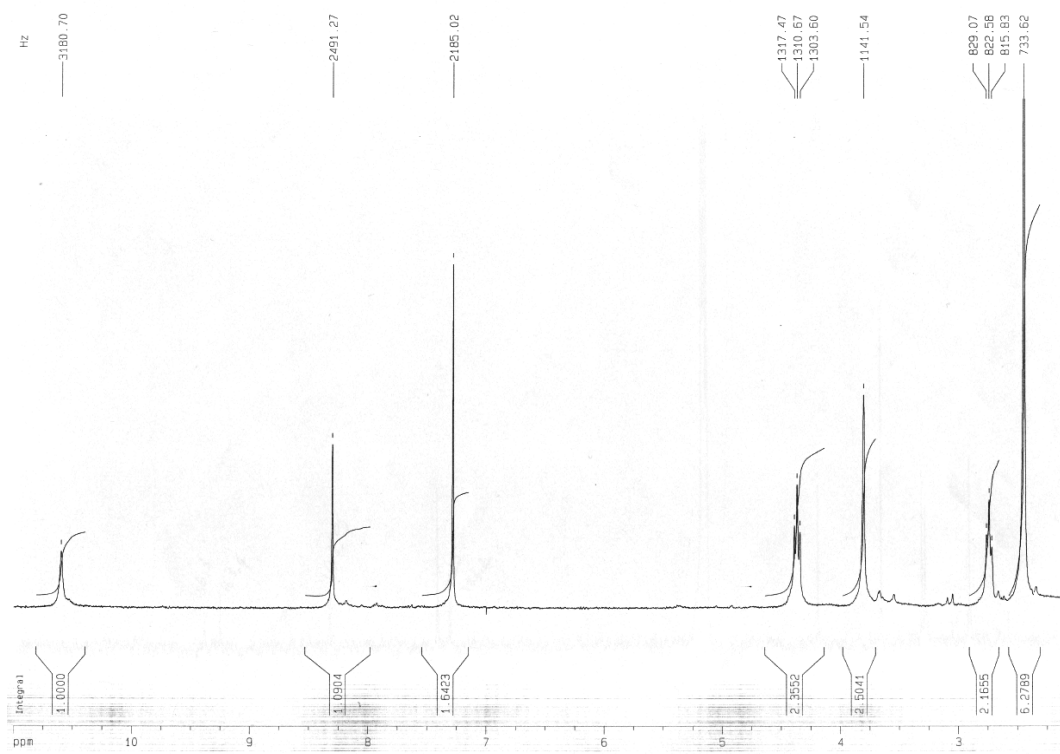

75 MHz  $^{13}\text{C}$  NMR spectra of 3a  $\text{CDCl}_3$

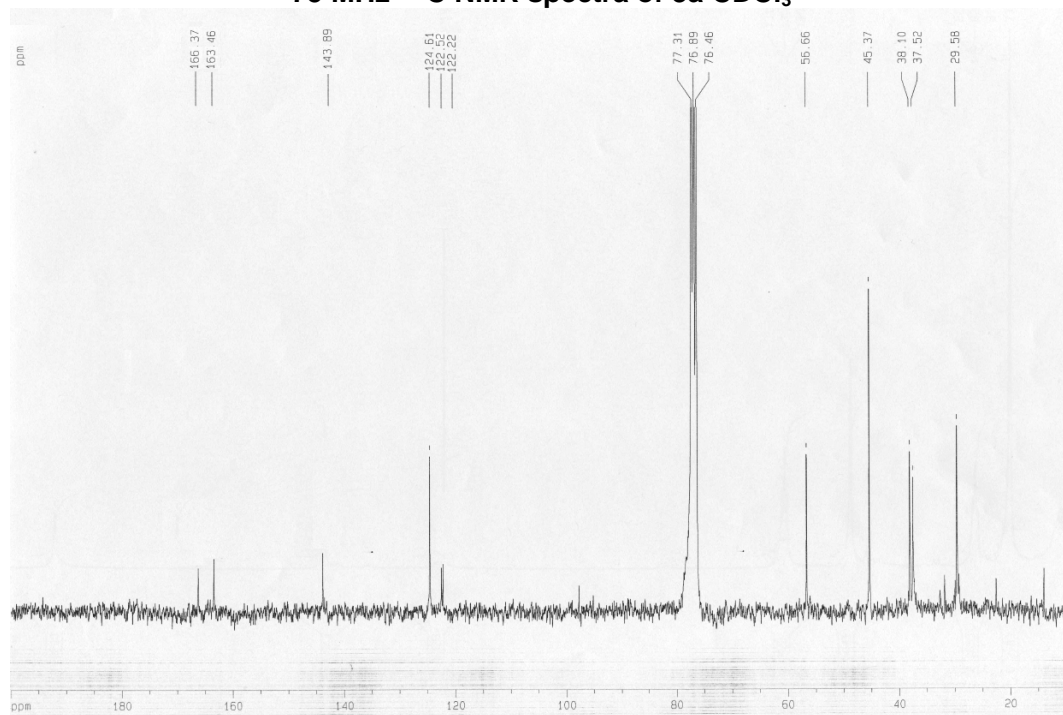



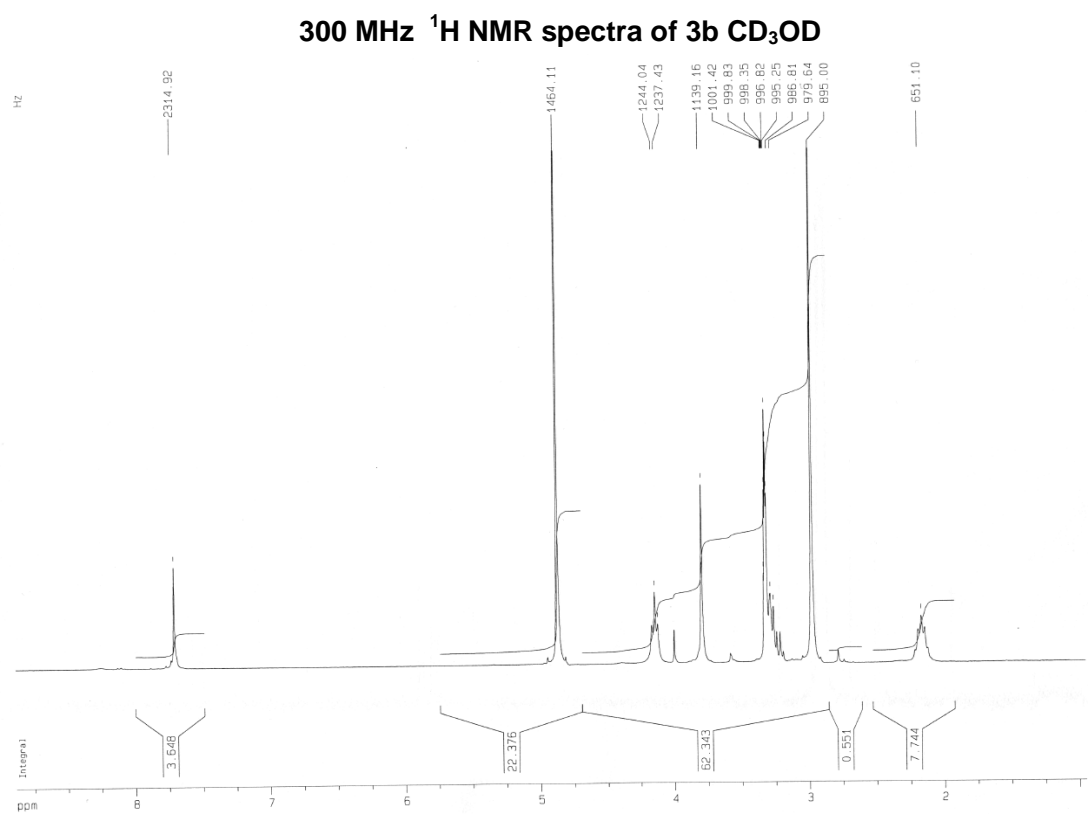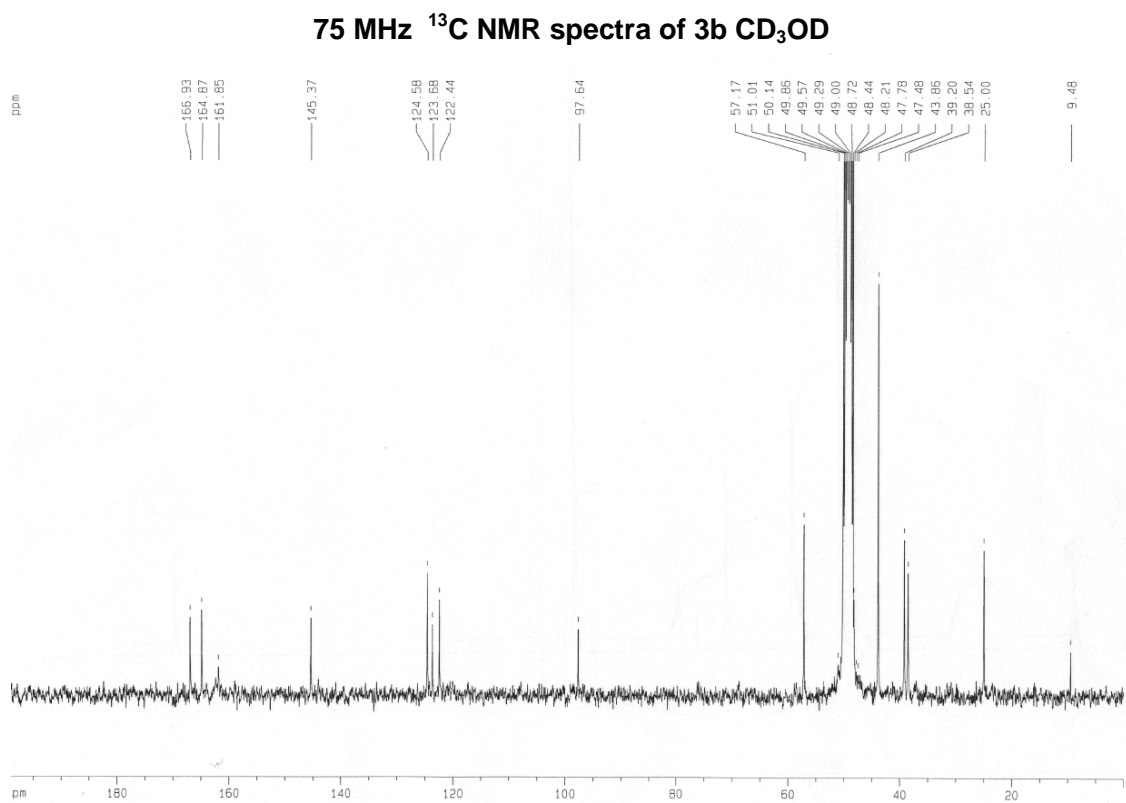

### 300 MHz $^1\text{H}$ NMR spectra of 4a $\text{CD}_3\text{OD}$

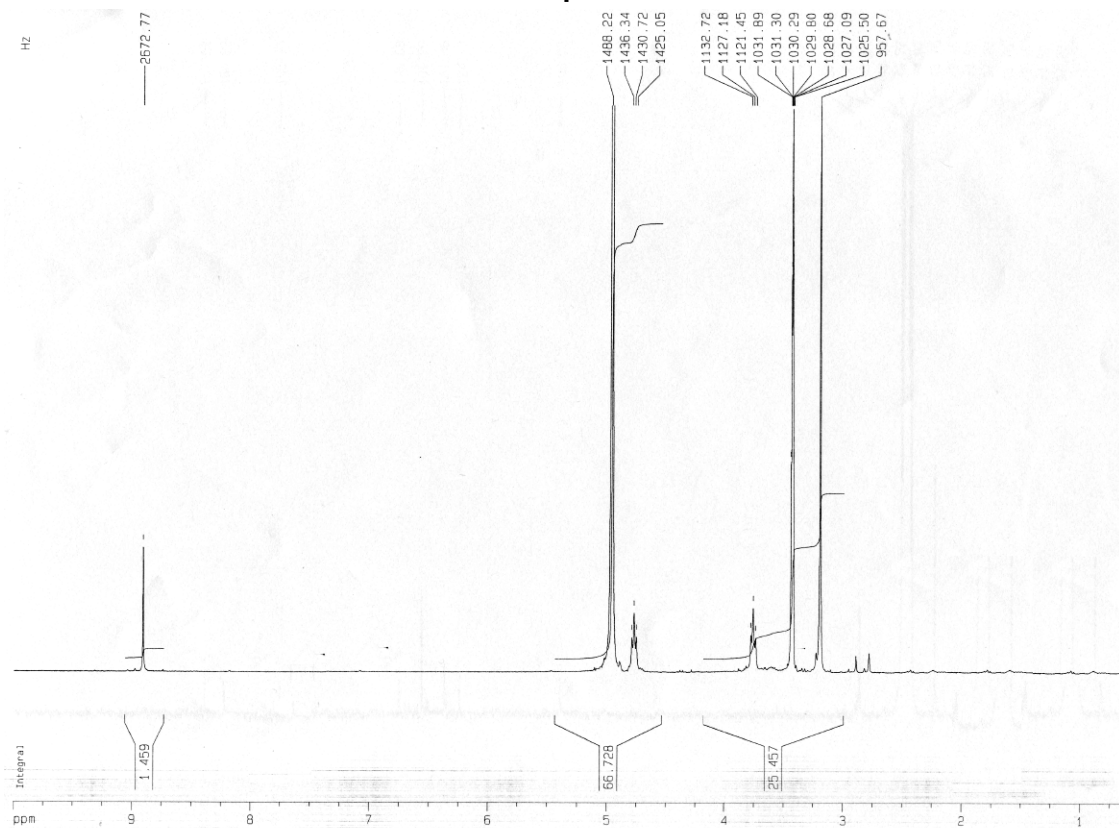

### 75 MHz $^{13}\text{C}$ NMR spectra of 4a $\text{CD}_3\text{OD}$

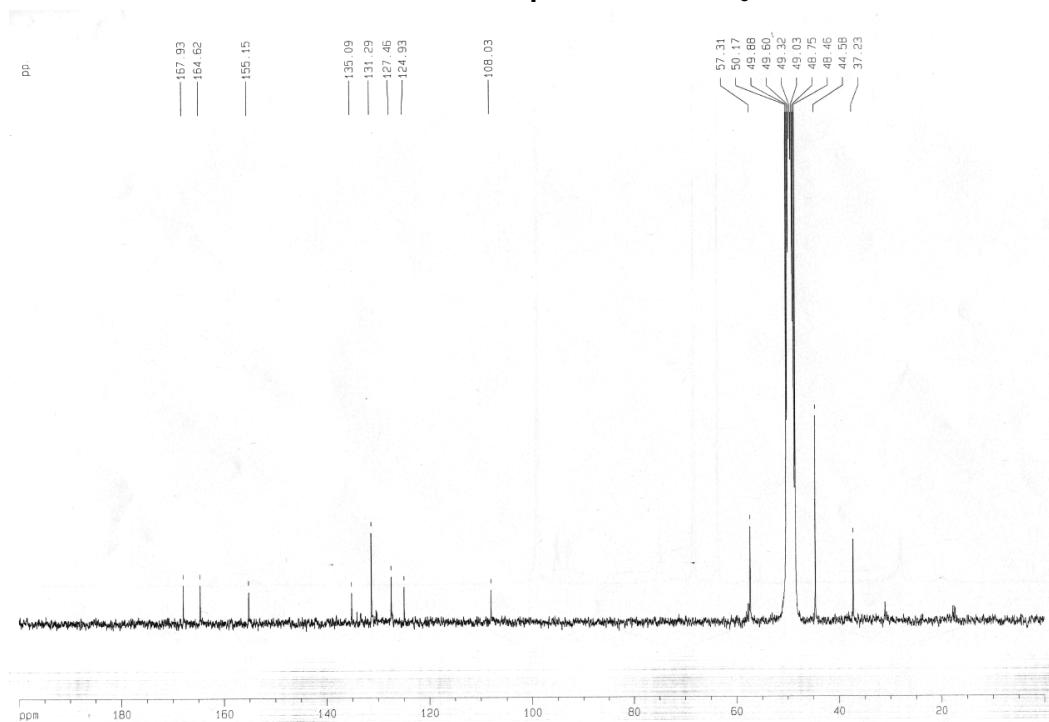

300 MHz <sup>1</sup>H NMR spectra of 4b CDCl<sub>3</sub>

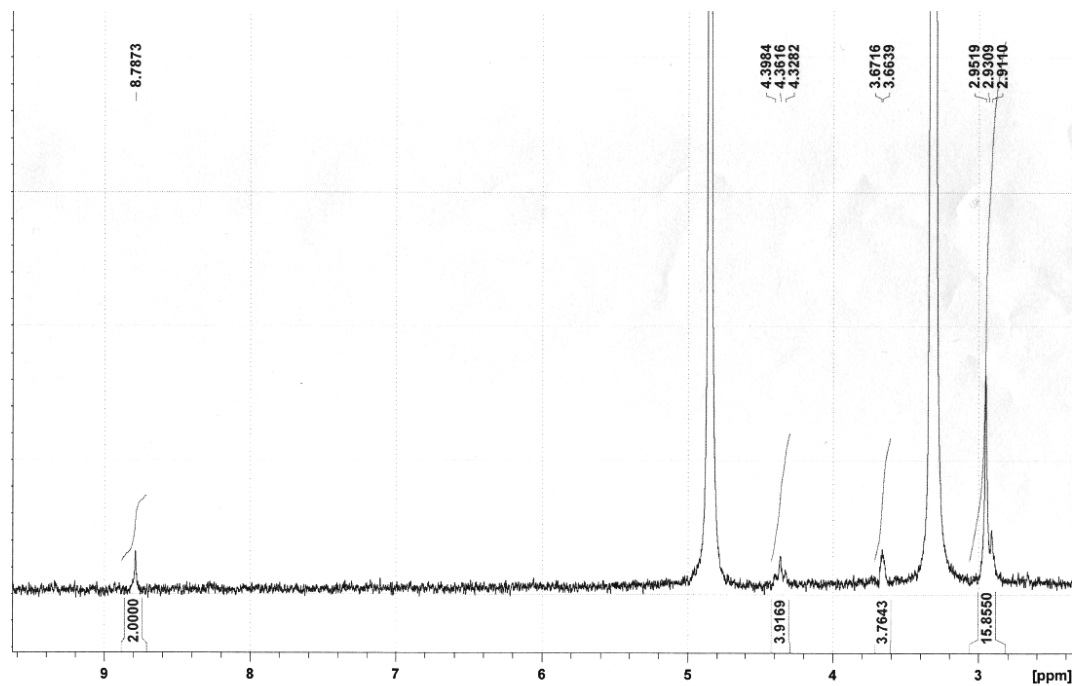

300 MHz <sup>1</sup>H NMR spectra of 6b CD<sub>3</sub>OD

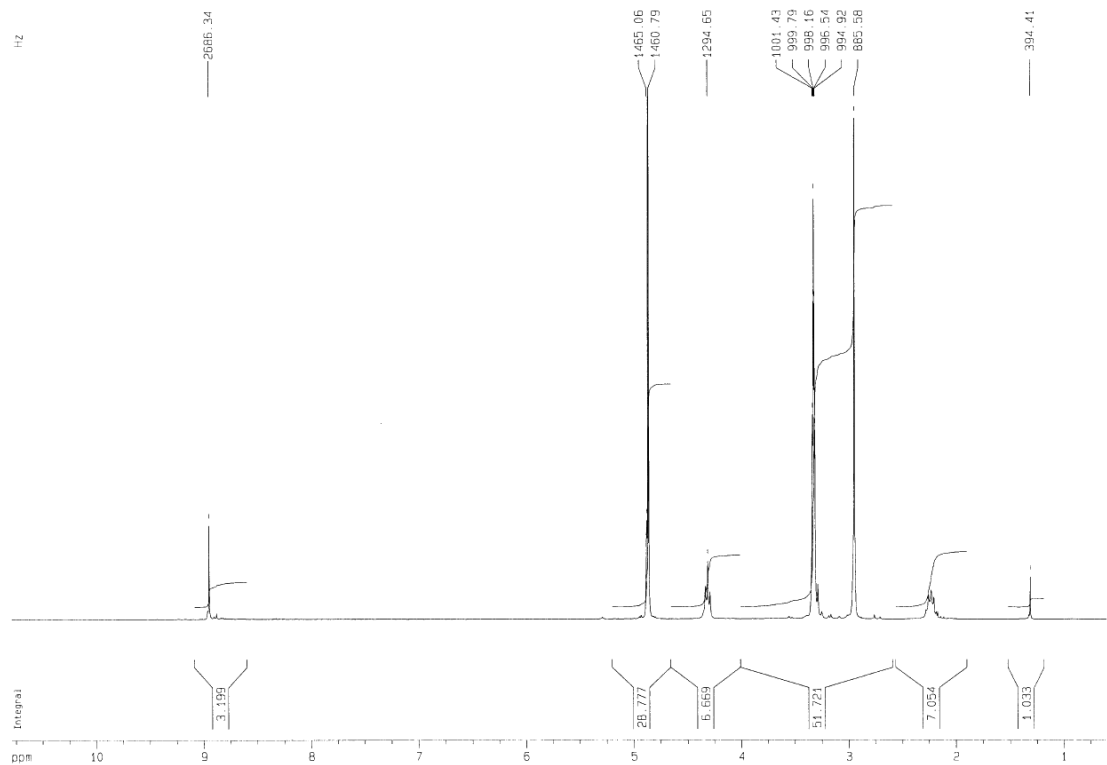

300 MHz <sup>1</sup>H NMR spectra of 6b CD<sub>3</sub>OD

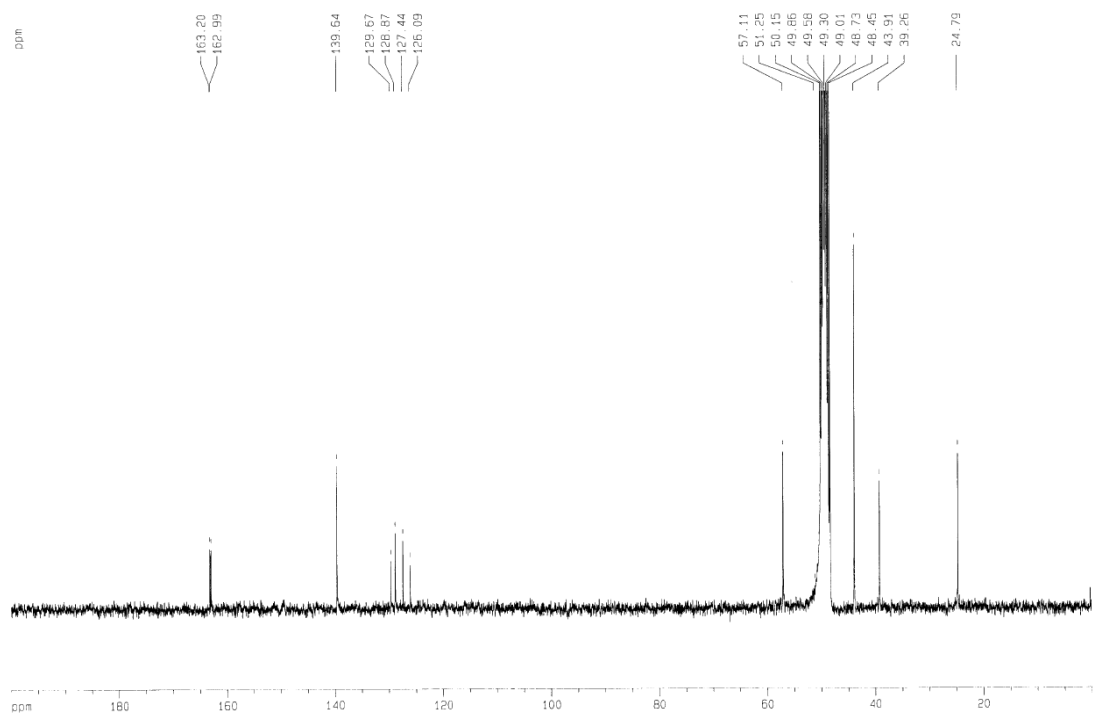

300 MHz <sup>1</sup>H NMR spectra of 7a CDCl<sub>3</sub>

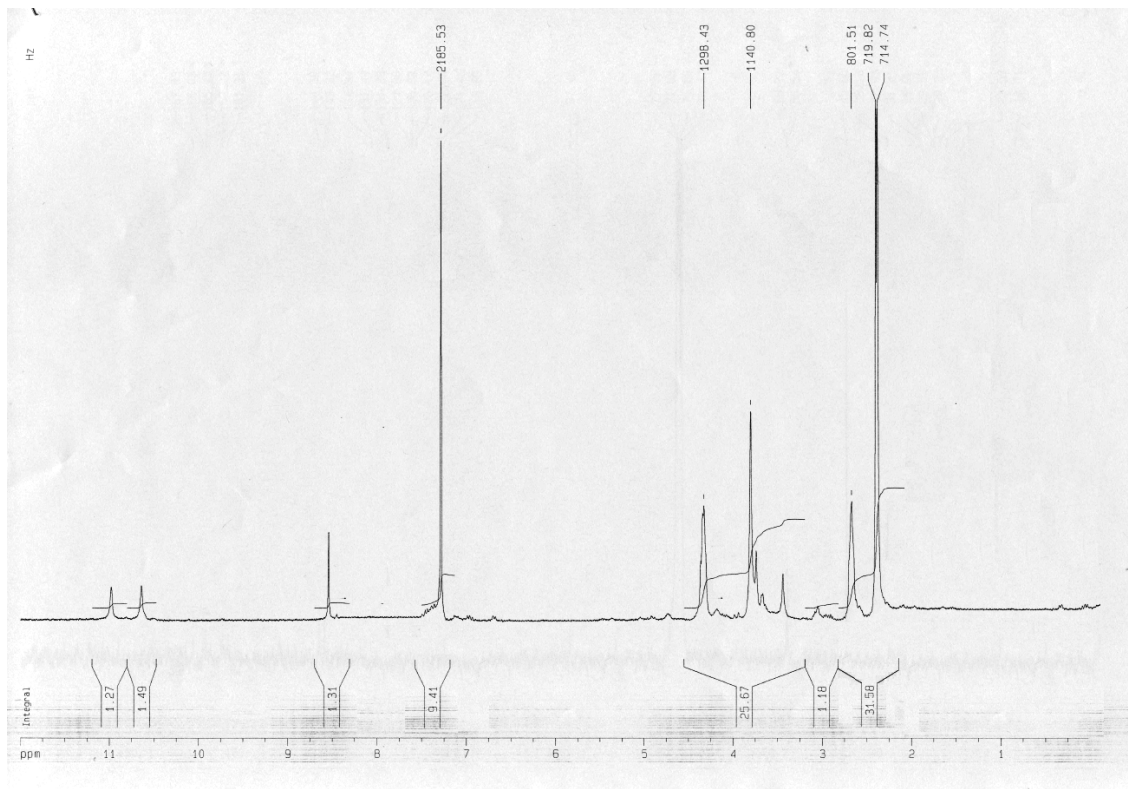

**75 MHz  $^{13}\text{C}$  NMR spectra of 7a  $\text{CDCl}_3$**

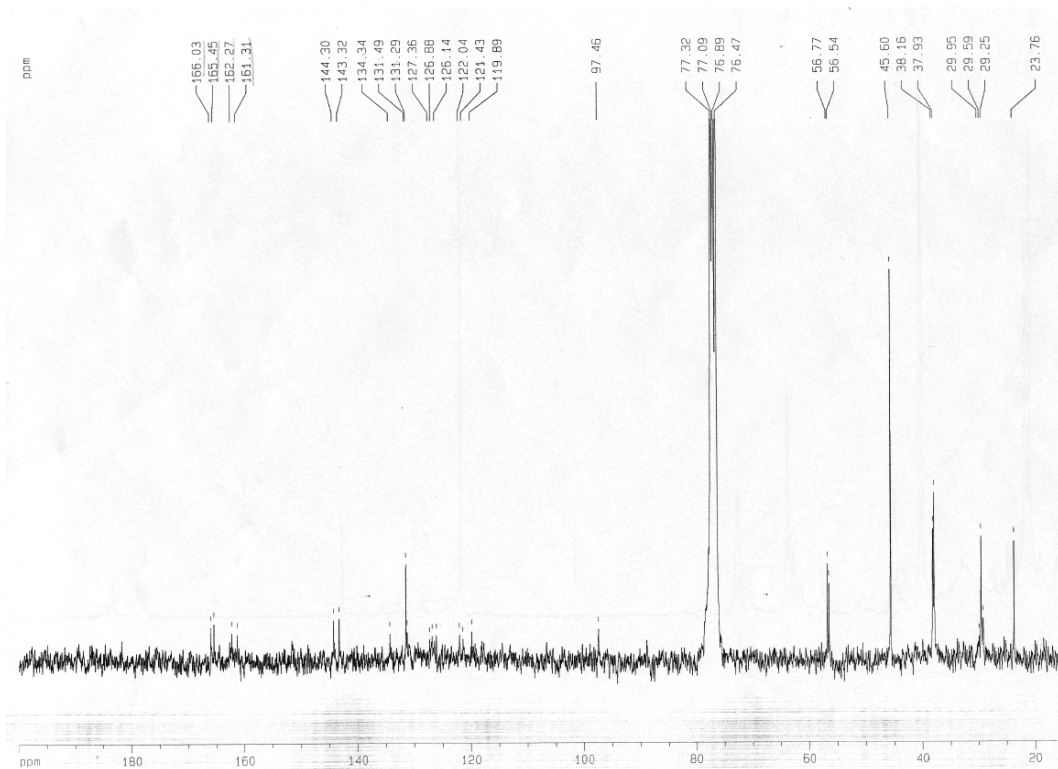

**300 MHz  $^1\text{H}$  NMR spectra of 7b  $\text{CDCl}_3$**

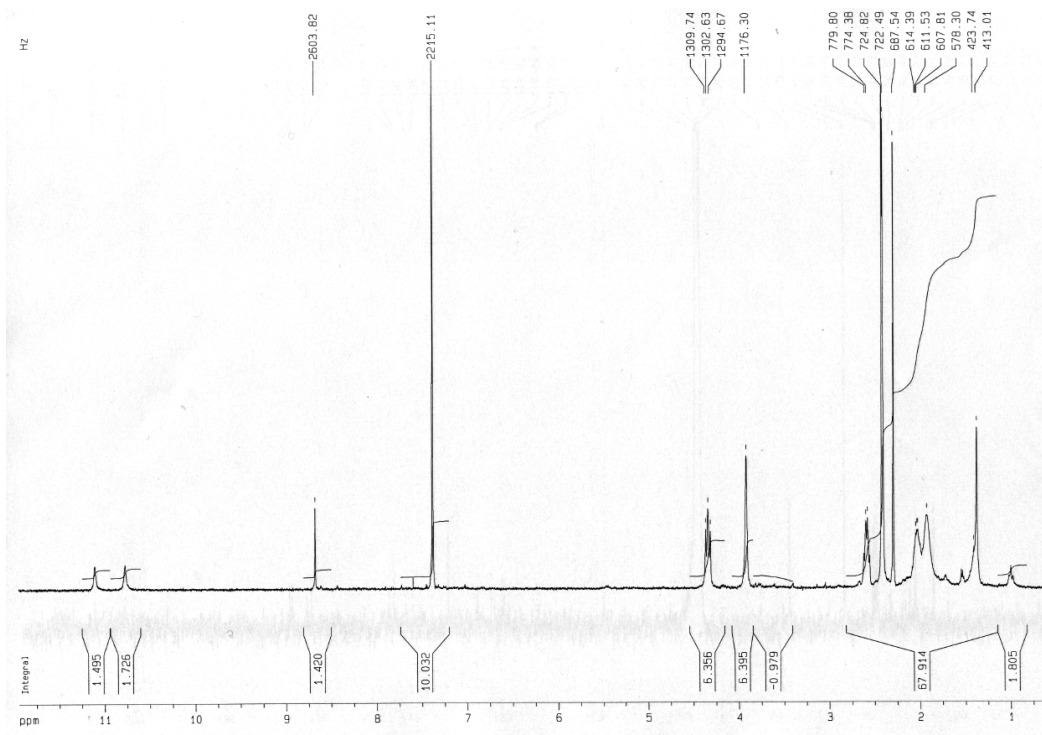



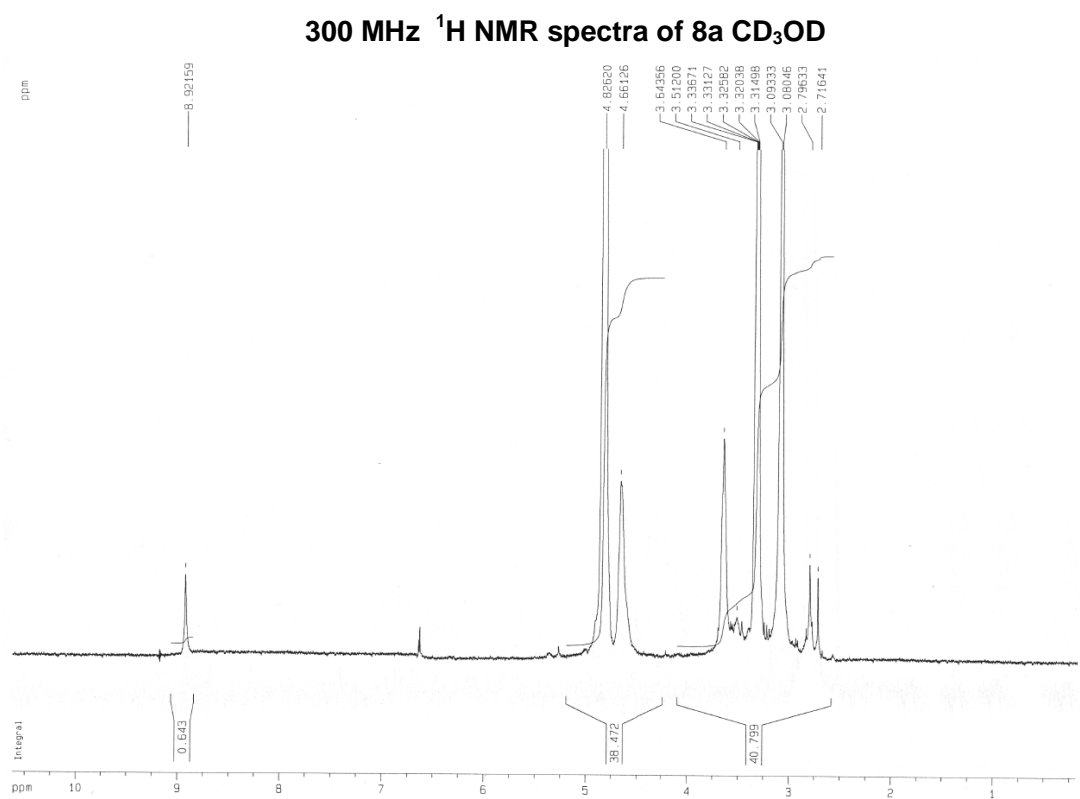

Supplement: c2ob07006e.pdf [file c2ob07006e.pdf]
